# Supplementary material for: Accelerometer- and Pedometer-Based Physical Activity Interventions Among Adults With Cardiometabolic Conditions: A Systematic Review and Meta-analysis
Source: PubMed Central journal article supplement (PMC6802237; doi:10.1001/jamanetworkopen.2019.12895), 2019-10-09

## Supplementary Online Content

Hodkinson A, Kontopantelis E, Adeniji C, et al. Accelerometer- and pedometer-based physical activity interventions among adults with cardiometabolic conditions: a systematic review and meta-analysis. *JAMA Netw Open*. 2019;2(10):e1912895. doi:10.1001/jamanetworkopen.2019.12895

**eTable 1.** Database Search Strategies

**eTable 2.** Summary of Participant Characteristics by Study

**eTable 3.** Summary of Intervention Characteristics by Study

**eFigure 1.** Risk of Bias Assessments Study-by-Study

**eFigure 2.** Forest Plot of Accelerometer vs Pedometer Use

**eFigure 3.** Forest Plot of Pedometer Use on Mean Difference Scale

**eFigure 4.** Cumulative Forest Plot of PA Performance Based on Total PA Engagement Time (Combined by Total Minutes)

**eFigure 5.** Forest Plot of Secondary Physical Activity Measures

**eFigure 6.** Individual Funnel Plots of Accelerometer and Pedometer

This supplementary material has been provided by the authors to give readers additional information about their work.

**eTable 1 – Database search strategies**

**CENTRAL**

|    |                                                                                              |       |
|----|----------------------------------------------------------------------------------------------|-------|
| 1  | Cardiovascular Diseases/                                                                     | 6666  |
| 2  | (cardiovascular adj1 disease\$.tw.                                                           | 13433 |
| 3  | cardiovascular risk factor\$.tw.                                                             | 3887  |
| 4  | exp heart diseases/                                                                          | 45369 |
| 5  | exp Coronary Artery Bypass/                                                                  | 5197  |
| 6  | exp Myocardial Revascularization/                                                            | 8863  |
| 7  | exp heart transplantation/                                                                   | 644   |
| 8  | Percutaneous Coronary Intervention/ or Angioplasty, Balloon, Coronary/                       | 4942  |
| 9  | Heart Valve Prosthesis/                                                                      | 508   |
| 10 | Pulmonary embolism/                                                                          | 837   |
| 11 | ((myocardial or cardiac or heart) adj2 (infarct* or isch?emi*)).tw.                          | 26477 |
| 12 | (coronary adj2 (syndrome* or disease* or event* or occlusion* or stenosis* or thrombo*)).tw. | 20888 |
| 13 | (myocard* adj2 revasculari?ation).tw.                                                        | 846   |

|    |                                                                                                                 |       |
|----|-----------------------------------------------------------------------------------------------------------------|-------|
| 14 | (STEMI or NSTEMI).tw.                                                                                           | 2624  |
| 15 | (ST adj2 (elevat* or depress*)).tw.                                                                             | 5979  |
| 16 | "heart transplant".tw.                                                                                          | 1057  |
| 17 | angina.tw.                                                                                                      | 8967  |
| 18 | (heart adj2 (failure or attack or bypass or disease*)).tw.                                                      | 29448 |
| 19 | ((heart or cardiac or myocard*) adj2 (fail* or insufficien* or decomp*)).tw.                                    | 19588 |
| 20 | (HFrEF or HFpEF or left ventricular ejection fraction or ((preserved or reduced) adj ejection fraction)).tw.    | 5359  |
| 21 | (LV dysfunction or (diastolic adj (dysfunction* or failure*)) or (systolic adj (dysfunction* or failure*))).tw. | 1801  |
| 22 | pulmonary embolism*.tw.                                                                                         | 2259  |
| 23 | CABG.tw.                                                                                                        | 3948  |
| 24 | (coronary adj2 bypass).tw.                                                                                      | 7925  |
| 25 | PTCA.tw.                                                                                                        | 942   |
| 26 | angioplast*.tw.                                                                                                 | 4529  |
| 27 | PCI.tw.                                                                                                         | 5751  |
| 28 | (Percutaneous adj2 intervention*).tw.                                                                           | 6769  |

|    |                                                                                                                                                                                                                                                                                                                                                                                        |        |
|----|----------------------------------------------------------------------------------------------------------------------------------------------------------------------------------------------------------------------------------------------------------------------------------------------------------------------------------------------------------------------------------------|--------|
| 29 | (stent* adj3 (heart or cardiac*).tw.                                                                                                                                                                                                                                                                                                                                                   | 192    |
| 30 | (heart valve adj1 (device* or artificial or prosthesis)).tw.                                                                                                                                                                                                                                                                                                                           | 23     |
| 31 | cardiomyopath*.tw.                                                                                                                                                                                                                                                                                                                                                                     | 2561   |
| 32 | cardiovascular disease*.tw.                                                                                                                                                                                                                                                                                                                                                            | 13341  |
| 33 | or/1-32                                                                                                                                                                                                                                                                                                                                                                                | 104233 |
| 34 | Diabetes mellitus/                                                                                                                                                                                                                                                                                                                                                                     | 6971   |
| 35 | diabet*.ti.                                                                                                                                                                                                                                                                                                                                                                            | 39648  |
| 36 | exp Diabetes Mellitus, Type 2/                                                                                                                                                                                                                                                                                                                                                         | 14550  |
| 37 | ((type 2 or type ii) adj2 diabet*).ti,ab.                                                                                                                                                                                                                                                                                                                                              | 24572  |
| 38 | ((non insulin* depend* or non insulin* depend* or non-insulin?depend* or non insulin?depend*) adj1 diabet*).ti,ab.                                                                                                                                                                                                                                                                     | 1299   |
| 39 | (T2DM or T2D or TIIDM or TIID or NIDDM or MODY or MODM or AODM).ti,ab.                                                                                                                                                                                                                                                                                                                 | 7104   |
| 40 | ((obes* or overweight) adj5 diabet*).ti,ab.                                                                                                                                                                                                                                                                                                                                            | 4094   |
| 41 | prediabetic state/                                                                                                                                                                                                                                                                                                                                                                     | 676    |
| 42 | (prediabetes or pre diabetes or raised glucose intolerance or impaired glucose level\$ or impaired glucose tolerance or IGT or impaired fasting glucose or IFT or FPG or fasting plasma glucose or impaired glucose regulation or impaired glucose metabolism or raised glycated haemoglobin or raised glycated hemoglobin or high glycated Hb or hyperglycaemia or hyperglycemia).tw. | 10228  |

|    |                                                                                                                                                |        |
|----|------------------------------------------------------------------------------------------------------------------------------------------------|--------|
| 43 | ((prevent* or avoid* or delay* or decreas* or reduc*) adj2 (type II diabetes or type 2 diabetes or T2D or DM or diabetes)).ti,ab.              | 3002   |
| 44 | or/34-43                                                                                                                                       | 52660  |
| 45 | exp Obesity/                                                                                                                                   | 11511  |
| 46 | Obese.tw.                                                                                                                                      | 16888  |
| 47 | exp Overweight/                                                                                                                                | 12889  |
| 48 | (BMI or body mass index).af.                                                                                                                   | 38142  |
| 49 | Weight gain/                                                                                                                                   | 2192   |
| 50 | (Overweight or over weight or obesity or adipose).af.                                                                                          | 32039  |
| 51 | exp Obesity/pc                                                                                                                                 | 70     |
| 52 | (body mass index or BMI).mp.                                                                                                                   | 38140  |
| 53 | or/45-52                                                                                                                                       | 59193  |
| 54 | Randomized Controlled Trial/                                                                                                                   | 139    |
| 55 | Clinical Trial/                                                                                                                                | 36     |
| 56 | randomized controlled trial.pt. or randomised controlled trial.mp. [mp=title, original title, abstract, mesh headings, heading words, keyword] | 475978 |
| 57 | controlled clinical trial.pt.                                                                                                                  | 90577  |

|    |                                                                                                         |        |
|----|---------------------------------------------------------------------------------------------------------|--------|
| 58 | trial*.ti,ab.                                                                                           | 461899 |
| 59 | or/54-58                                                                                                | 792878 |
| 60 | pedomet*.mp.                                                                                            | 1158   |
| 61 | ((step* or walk*) adj2 (count* or sensor or meter)).ti,ab.                                              | 1023   |
| 62 | Accelerometry/ or (accelerom* or actimeter or actigraph or actiwatch or GT3X).ti,ab.                    | 2916   |
| 63 | ((activit* or move* or motion or energy or exercise) adj2 (monitor* or sens* or detect* or count*)).tw. | 4904   |
| 64 | or/60-63                                                                                                | 8948   |
| 65 | 33 or 44 or 53                                                                                          | 190184 |
| 66 | 59 and 64 and 65                                                                                        | 1235   |
| 67 | limit 66 to (yr="2000 -Current")                                                                        | 955    |

**MEDLINE**

|   |                                    |         |
|---|------------------------------------|---------|
| 1 | Cardiovascular Diseases/           | 133684  |
| 2 | (cardiovascular adj1 disease\$.tw. | 126766  |
| 3 | cardiovascular risk factor\$.tw.   | 27611   |
| 4 | exp heart diseases/                | 1054821 |
| 5 | exp Coronary Artery Bypass/        | 50410   |

|    |                                                                                                                 |        |
|----|-----------------------------------------------------------------------------------------------------------------|--------|
| 6  | exp Myocardial Revascularization/                                                                               | 88324  |
| 7  | exp heart transplantation/                                                                                      | 33677  |
| 8  | Percutaneous Coronary Intervention/ or Angioplasty, Balloon, Coronary/                                          | 47242  |
| 9  | Heart Valve Prosthesis/                                                                                         | 32984  |
| 10 | Pulmonary embolism/                                                                                             | 36617  |
| 11 | ((myocardial or cardiac or heart) adj2 (infarct* or isch?emi*)).tw.                                             | 220446 |
| 12 | (coronary adj2 (syndrome* or disease* or event* or occlusion* or stenosis* or thrombo*)).tw.                    | 163423 |
| 13 | (myocard* adj2 revasculari?ation).tw.                                                                           | 5030   |
| 14 | (STEMI or NSTEMI).tw.                                                                                           | 8127   |
| 15 | (ST adj2 (elevat* or depress*)).tw.                                                                             | 26366  |
| 16 | "heart transplant".tw.                                                                                          | 19363  |
| 17 | angina.tw.                                                                                                      | 46983  |
| 18 | (heart adj2 (failure or attack or bypass or disease*)).tw.                                                      | 263874 |
| 19 | ((heart or cardiac or myocard*) adj2 (fail* or insufficien* or decomp*)).tw.                                    | 148299 |
| 20 | (HFpEF or HFrEF or left ventricular ejection fraction or ((preserved or reduced) adj ejection fraction)).tw.    | 23398  |
| 21 | (LV dysfunction or (diastolic adj (dysfunction* or failure*)) or (systolic adj (dysfunction* or failure*))).tw. | 15648  |
| 22 | pulmonary embolism*.tw.                                                                                         | 26641  |
| 23 | CABG.tw.                                                                                                        | 14577  |
| 24 | (coronary adj2 bypass).tw.                                                                                      | 40893  |

|    |                                                                                                                    |         |
|----|--------------------------------------------------------------------------------------------------------------------|---------|
| 25 | PTCA.tw.                                                                                                           | 6155    |
| 26 | angioplast*.tw.                                                                                                    | 38670   |
| 27 | PCI.tw.                                                                                                            | 18356   |
| 28 | (Percutaneous adj2 intervention*).tw.                                                                              | 27045   |
| 29 | (stent* adj3 (heart or cardiac*).tw.                                                                               | 713     |
| 30 | (heart valve adj1 (device* or artificial or prosthesis)).tw.                                                       | 640     |
| 31 | cardiomyopath*.tw.                                                                                                 | 56776   |
| 32 | cardiovascular disease*.tw.                                                                                        | 126481  |
| 33 | or/1-32                                                                                                            | 1431773 |
| 34 | Diabetes mellitus/                                                                                                 | 110003  |
| 35 | diabet*.ti.                                                                                                        | 275754  |
| 36 | exp Diabetes Mellitus, Type 2/                                                                                     | 118032  |
| 37 | ((type 2 or type ii) adj2 diabet*).ti,ab.                                                                          | 104502  |
| 38 | ((non insulin* depend* or non insulin* depend* or non-insulin?depend* or non insulin?depend*) adj1 diabet*).ti,ab. | 9765    |
| 39 | (T2DM or T2D or TIIDM or TIID or NIDDM or MODY or MODM or AODM).ti,ab.                                             | 24874   |
| 40 | ((obes* or overweight) adj5 diabet*).ti,ab.                                                                        | 33363   |
| 41 | prediabetic state/                                                                                                 | 5828    |



|    |                                                                                                                                                                                                                                                                                                                                                                                                    |        |
|----|----------------------------------------------------------------------------------------------------------------------------------------------------------------------------------------------------------------------------------------------------------------------------------------------------------------------------------------------------------------------------------------------------|--------|
| 42 | (prediabetes or pre diabetes or raised glucose intolerance or impaired glucose level\$ or impaired glucose tolerance or IGT or impaired fasting glucose or IFT or FPG or fasting plasma glucose or impaired glucose regulation or impaired glucose metabolism or raised glycosylated haemoglobin or raised glycosylated hemoglobin or high glycosylated Hb or hyperglycaemia or hyperglycemia).tw. | 66538  |
| 43 | ((prevent* or avoid* or delay* or decreas* or reduc*) adj2 (type II diabetes or type 2 diabetes or T2D or DM or diabetes)).ti,ab.                                                                                                                                                                                                                                                                  | 10576  |
| 44 | or/34-43                                                                                                                                                                                                                                                                                                                                                                                           | 413403 |
| 45 | exp Obesity/                                                                                                                                                                                                                                                                                                                                                                                       | 190772 |
| 46 | Obese.tw.                                                                                                                                                                                                                                                                                                                                                                                          | 98427  |
| 47 | exp Overweight/                                                                                                                                                                                                                                                                                                                                                                                    | 196089 |
| 48 | (BMI or body mass index).af.                                                                                                                                                                                                                                                                                                                                                                       | 215384 |
| 49 | Weight gain/                                                                                                                                                                                                                                                                                                                                                                                       | 29152  |
| 50 | (Overweight or over weight or obesity or adipose).af.                                                                                                                                                                                                                                                                                                                                              | 359886 |
| 51 | exp Obesity/pc                                                                                                                                                                                                                                                                                                                                                                                     | 17490  |
| 52 | (body mass index or BMI).mp.                                                                                                                                                                                                                                                                                                                                                                       | 214547 |
| 53 | or/45-52                                                                                                                                                                                                                                                                                                                                                                                           | 512732 |
| 54 | Randomized Controlled Trial/                                                                                                                                                                                                                                                                                                                                                                       | 471246 |
| 55 | Clinical Trial/                                                                                                                                                                                                                                                                                                                                                                                    | 512920 |
| 56 | randomized controlled trial.pt. or randomised controlled trial.mp. [mp=title, abstract, original title, name of substance word, subject heading word, floating sub-heading word, keyword heading word, protocol supplementary concept word, rare disease supplementary concept word, unique identifier, synonyms]                                                                                  | 474589 |
| 57 | controlled clinical trial.pt.                                                                                                                                                                                                                                                                                                                                                                      | 92735  |

|    |                                                                                                         |         |
|----|---------------------------------------------------------------------------------------------------------|---------|
| 58 | trial*.ti,ab.                                                                                           | 782813  |
| 59 | or/54-58                                                                                                | 1314824 |
| 60 | pedomet*.mp.                                                                                            | 2066    |
| 61 | ((step* or walk*) adj2 (count* or sensor or meter)).ti,ab.                                              | 2186    |
| 62 | Accelerometry/ or (accelerom* or actimeter or actigraph or actiwatch or GT3X).ti,ab.                    | 12575   |
| 63 | ((activit* or move* or motion or energy or exercise) adj2 (monitor* or sens* or detect* or count*)).tw. | 57550   |
| 64 | or/60-63                                                                                                | 71232   |
| 65 | 33 or 44 or 53                                                                                          | 2151515 |
| 66 | 59 and 64 and 65                                                                                        | 1221    |
| 67 | limit 66 to (abstracts and english language and yr="2000 -Current")                                     | 884     |

## EMBASE

|   |                                     |         |
|---|-------------------------------------|---------|
| 1 | Cardiovascular Diseases/            | 27934   |
| 2 | (cardiovascular adj1 disease\$).tw. | 210253  |
| 3 | cardiovascular risk factor\$.tw.    | 48502   |
| 4 | exp heart diseases/                 | 1574118 |
| 5 | exp Coronary Artery Bypass/         | 65821   |
| 6 | exp Myocardial Revascularization/   | 28857   |

|    |                                                                                                                 |        |
|----|-----------------------------------------------------------------------------------------------------------------|--------|
| 7  | exp heart transplantation/                                                                                      | 58769  |
| 8  | Percutaneous Coronary Intervention/ or Angioplasty, Balloon, Coronary/                                          | 90210  |
| 9  | Heart Valve Prosthesis/                                                                                         | 17362  |
| 10 | Pulmonary embolism/                                                                                             | 16190  |
| 11 | ((myocardial or cardiac or heart) adj2 (infarct* or isch?emi*)).tw.                                             | 316111 |
| 12 | (coronary adj2 (syndrome* or disease* or event* or occlusion* or stenosis* or thrombo*)).tw.                    | 255427 |
| 13 | (myocard* adj2 revasculari?ation).tw.                                                                           | 6419   |
| 14 | (STEMI or NSTEMI).tw.                                                                                           | 26241  |
| 15 | (ST adj2 (elevat* or depress*)).tw.                                                                             | 49357  |
| 16 | "heart transplant".tw.                                                                                          | 33742  |
| 17 | angina.tw.                                                                                                      | 64386  |
| 18 | (heart adj2 (failure or attack or bypass or disease*)).tw.                                                      | 419907 |
| 19 | ((heart or cardiac or myocard*) adj2 (fail* or insufficien* or decomp*)).tw.                                    | 258415 |
| 20 | (HFpEF or HFrEF or left ventricular ejection fraction or ((preserved or reduced) adj ejection fraction)).tw.    | 49745  |
| 21 | (LV dysfunction or (diastolic adj (dysfunction* or failure*)) or (systolic adj (dysfunction* or failure*))).tw. | 35292  |
| 22 | pulmonary embolism*.tw.                                                                                         | 42992  |
| 23 | CABG.tw.                                                                                                        | 29163  |
| 24 | (coronary adj2 bypass).tw.                                                                                      | 57224  |
| 25 | PTCA.tw.                                                                                                        | 8314   |

|    |                                                                                                                                                                                                                                                                                                                                                                                        |         |
|----|----------------------------------------------------------------------------------------------------------------------------------------------------------------------------------------------------------------------------------------------------------------------------------------------------------------------------------------------------------------------------------------|---------|
| 26 | angioplast*.tw.                                                                                                                                                                                                                                                                                                                                                                        | 57039   |
| 27 | PCI.tw.                                                                                                                                                                                                                                                                                                                                                                                | 49938   |
| 28 | (Percutaneous adj2 intervention*).tw.                                                                                                                                                                                                                                                                                                                                                  | 55644   |
| 29 | (stent* adj3 (heart or cardiac*).tw.                                                                                                                                                                                                                                                                                                                                                   | 1414    |
| 30 | (heart valve adj1 (device* or artificial or prosthesis)).tw.                                                                                                                                                                                                                                                                                                                           | 676     |
| 31 | cardiomyopath*.tw.                                                                                                                                                                                                                                                                                                                                                                     | 96522   |
| 32 | cardiovascular disease*.tw.                                                                                                                                                                                                                                                                                                                                                            | 209710  |
| 33 | or/1-32                                                                                                                                                                                                                                                                                                                                                                                | 2034903 |
| 34 | Diabetes mellitus/                                                                                                                                                                                                                                                                                                                                                                     | 478943  |
| 35 | diabet*.ti.                                                                                                                                                                                                                                                                                                                                                                            | 392808  |
| 36 | exp Diabetes Mellitus, Type 2/                                                                                                                                                                                                                                                                                                                                                         | 222272  |
| 37 | ((type 2 or type ii) adj2 diabet*).ti,ab.                                                                                                                                                                                                                                                                                                                                              | 193955  |
| 38 | ((non insulin* depend* or non insulin* depend* or non-insulin?depend* or non insulin?depend*) adj1 diabet*).ti,ab.                                                                                                                                                                                                                                                                     | 11477   |
| 39 | (T2DM or T2D or TIIDM or TIID or NIDDM or MODY or MODM or AODM).ti,ab.                                                                                                                                                                                                                                                                                                                 | 54243   |
| 40 | ((obes* or overweight) adj5 diabet*).ti,ab.                                                                                                                                                                                                                                                                                                                                            | 59023   |
| 41 | prediabetic state/                                                                                                                                                                                                                                                                                                                                                                     | 10060   |
| 42 | (prediabetes or pre diabetes or raised glucose intolerance or impaired glucose level\$ or impaired glucose tolerance or IGT or impaired fasting glucose or IFT or FPG or fasting plasma glucose or impaired glucose regulation or impaired glucose metabolism or raised glycated haemoglobin or raised glycated hemoglobin or high glycated Hb or hyperglycaemia or hyperglycemia).tw. | 111078  |

|    |                                                                                                                                                                                                                                                           |         |
|----|-----------------------------------------------------------------------------------------------------------------------------------------------------------------------------------------------------------------------------------------------------------|---------|
| 43 | ((prevent* or avoid* or delay* or decreas* or reduc*) adj2 (type II diabetes or type 2 diabetes or T2D or DM or diabetes)).ti,ab.                                                                                                                         | 17475   |
| 44 | or/34-43                                                                                                                                                                                                                                                  | 852436  |
| 45 | exp Obesity/                                                                                                                                                                                                                                              | 446884  |
| 46 | Obese.tw.                                                                                                                                                                                                                                                 | 170709  |
| 47 | exp Overweight/                                                                                                                                                                                                                                           | 446884  |
| 48 | (BMI or body mass index).af.                                                                                                                                                                                                                              | 383309  |
| 49 | Weight gain/                                                                                                                                                                                                                                              | 88145   |
| 50 | (Overweight or over weight or obesity or adipose).af.                                                                                                                                                                                                     | 568723  |
| 51 | exp Obesity/pc                                                                                                                                                                                                                                            | 14621   |
| 52 | (body mass index or BMI).mp.                                                                                                                                                                                                                              | 380105  |
| 53 | or/45-52                                                                                                                                                                                                                                                  | 902769  |
| 54 | Randomized Controlled Trial/                                                                                                                                                                                                                              | 520242  |
| 55 | Clinical Trial/                                                                                                                                                                                                                                           | 941000  |
| 56 | randomized controlled trial.pt. or randomised controlled trial.mp. [mp=title, abstract, heading word, drug trade name, original title, device manufacturer, drug manufacturer, device trade name, keyword, floating subheading word, candidate term word] | 26730   |
| 57 | controlled clinical trial.tw.                                                                                                                                                                                                                             | 14567   |
| 58 | trial*.ti,ab.                                                                                                                                                                                                                                             | 1244572 |
| 59 | or/54-58                                                                                                                                                                                                                                                  | 1968678 |
| 60 | pedomet*.mp.                                                                                                                                                                                                                                              | 3611    |

|    |                                                                                                         |         |
|----|---------------------------------------------------------------------------------------------------------|---------|
| 61 | ((step* or walk*) adj2 (count* or sensor or meter)).ti,ab.                                              | 4310    |
| 62 | Accelerometry/ or (accelerom* or actimeter or actigraph or actiwatch or GT3X).ti,ab.                    | 20037   |
| 63 | ((activit* or move* or motion or energy or exercise) adj2 (monitor* or sens* or detect* or count*)).tw. | 75480   |
| 64 | or/60-63                                                                                                | 98146   |
| 65 | 33 or 44 or 53                                                                                          | 3254734 |
| 66 | 59 and 64 and 65                                                                                        | 1119    |
| 67 | limit 66 to (yr="2000 -Current")                                                                        | 896     |

#### PsycINFO

|   |                                                                                              |       |
|---|----------------------------------------------------------------------------------------------|-------|
| 1 | (cardiovascular adj1 disease\$).tw.                                                          | 10610 |
| 2 | cardiovascular risk factor\$.tw.                                                             | 2127  |
| 3 | ((myocardial or cardiac or heart) adj2 (infarct* or isch?emi*)).tw.                          | 5502  |
| 4 | (coronary adj2 (syndrome* or disease* or event* or occlusion* or stenosis* or thrombo*)).tw. | 6968  |
| 5 | (myocard* adj2 revasculari?ation).tw.                                                        | 27    |
| 6 | (STEMI or NSTEMI).tw.                                                                        | 43    |
| 7 | (ST adj2 (elevat* or depress*)).tw.                                                          | 178   |
| 8 | "heart transplant".tw.                                                                       | 357   |

|    |                                                                                                                 |       |
|----|-----------------------------------------------------------------------------------------------------------------|-------|
| 9  | angina.tw.                                                                                                      | 1043  |
| 10 | (heart adj2 (failure or attack or bypass or disease*)).tw.                                                      | 13745 |
| 11 | ((heart or cardiac or myocard*) adj2 (fail* or insufficien* or decomp*)).tw.                                    | 3754  |
| 12 | (HFpEF or HFrEF or left ventricular ejection fraction or ((preserved or reduced) adj ejection fraction)).tw.    | 263   |
| 13 | (LV dysfunction or (diastolic adj (dysfunction* or failure*)) or (systolic adj (dysfunction* or failure*))).tw. | 135   |
| 14 | pulmonary embolism*.tw.                                                                                         | 248   |
| 15 | CABG.tw.                                                                                                        | 424   |
| 16 | (coronary adj2 bypass).tw.                                                                                      | 954   |
| 17 | PTCA.tw.                                                                                                        | 52    |
| 18 | angioplast*.tw.                                                                                                 | 338   |
| 19 | PCI.tw.                                                                                                         | 552   |
| 20 | (Percutaneous adj2 intervention*).tw.                                                                           | 214   |
| 21 | (stent* adj3 (heart or cardiac*)).tw.                                                                           | 6     |
| 22 | (heart valve adj1 (device* or artificial or prosthesis)).tw.                                                    | 1     |
| 23 | cardiomyopath*.tw.                                                                                              | 740   |

|    |                                                                                                                                                                                                                                                                                                                                                                                        |       |
|----|----------------------------------------------------------------------------------------------------------------------------------------------------------------------------------------------------------------------------------------------------------------------------------------------------------------------------------------------------------------------------------------|-------|
| 24 | cardiovascular disease*.tw.                                                                                                                                                                                                                                                                                                                                                            | 10571 |
| 25 | Diabetes mellitus/                                                                                                                                                                                                                                                                                                                                                                     | 4974  |
| 26 | diabet*.ti.                                                                                                                                                                                                                                                                                                                                                                            | 12939 |
| 27 | ((type 2 or type ii) adj2 diabet*).ti,ab.                                                                                                                                                                                                                                                                                                                                              | 7099  |
| 28 | ((non insulin* depend* or non insulin* depend* or non-insulin?depend* or non insulin?depend*) adj1 diabet*).ti,ab.                                                                                                                                                                                                                                                                     | 185   |
| 29 | (T2DM or T2D or TIIDM or TIID or NIDDM or MODY or MODM or AODM).ti,ab.                                                                                                                                                                                                                                                                                                                 | 1278  |
| 30 | ((obes* or overweight) adj5 diabet*).ti,ab.                                                                                                                                                                                                                                                                                                                                            | 2401  |
| 31 | (prediabetes or pre diabetes or raised glucose intolerance or impaired glucose level\$ or impaired glucose tolerance or IGT or impaired fasting glucose or IFT or FPG or fasting plasma glucose or impaired glucose regulation or impaired glucose metabolism or raised glycated haemoglobin or raised glycated hemoglobin or high glycated Hb or hyperglycaemia or hyperglycemia).tw. | 3307  |
| 32 | ((prevent* or avoid* or delay* or decreas* or reduc*) adj2 (type II diabetes or type 2 diabetes or T2D or DM or diabetes)).ti,ab.                                                                                                                                                                                                                                                      | 998   |
| 33 | exp Obesity/                                                                                                                                                                                                                                                                                                                                                                           | 22507 |
| 34 | Obese.tw.                                                                                                                                                                                                                                                                                                                                                                              | 15153 |
| 35 | exp Overweight/                                                                                                                                                                                                                                                                                                                                                                        | 23747 |
| 36 | (BMI or body mass index).af.                                                                                                                                                                                                                                                                                                                                                           | 51999 |
| 37 | Weight gain/                                                                                                                                                                                                                                                                                                                                                                           | 2873  |



|    |                                                                                                                                                                          |        |
|----|--------------------------------------------------------------------------------------------------------------------------------------------------------------------------|--------|
| 38 | (Overweight or over weight or obesity or adipose).af.                                                                                                                    | 115429 |
| 39 | (body mass index or BMI).mp.                                                                                                                                             | 24864  |
| 40 | Clinical Trial/                                                                                                                                                          | 11150  |
| 41 | randomized controlled trial.pt. or randomised controlled trial.mp. [mp=title, abstract, heading word, table of contents, key concepts, original title, tests & measures] | 3123   |
| 42 | trial*.ti,ab.                                                                                                                                                            | 166288 |
| 43 | pedomet*.mp.                                                                                                                                                             | 801    |
| 44 | ((step* or walk*) adj2 (count* or sensor or meter)).ti,ab.                                                                                                               | 647    |
| 45 | Accelerometry/ or (accelerom* or actimeter or actigraph or actiwatch or GT3X).ti,ab.                                                                                     | 3449   |
| 46 | ((activit* or move* or motion or energy or exercise) adj2 (monitor* or sens* or detect* or count*)).tw.                                                                  | 11302  |
| 47 | or/43-46                                                                                                                                                                 | 15379  |
| 48 | or/1-39                                                                                                                                                                  | 167632 |
| 49 | or/40-42                                                                                                                                                                 | 167428 |
| 50 | 47 and 48 and 49                                                                                                                                                         | 387    |
| 51 | limit 50 to (yr="2000 -Current")                                                                                                                                         | 377    |

**eTable 2 - Summary of participant characteristics by study**

|                   | Study author   | No. of participants in trial | Location | Age of participants (mean (SD)) years | Gender of participants (%)             | Ethnicity                        | Target population for study recruitment    | Multimorbidity or other health issues at baseline                            |
|-------------------|----------------|------------------------------|----------|---------------------------------------|----------------------------------------|----------------------------------|--------------------------------------------|------------------------------------------------------------------------------|
| <b>Pedometer:</b> | Anderson 2015  | 38                           | US       | 57 (10.8)                             | Int: 3/18 (17% F)<br>Con: 8/20 (40% F) | 57% white                        | Coronary artery disease                    | No                                                                           |
|                   | Araiza 2006    | 30                           | Mexico   | Int: 49 (11);<br>Con: 51 (10)         | NR                                     | NR                               | Type 2 diabetes mellitus diagnosed         | No                                                                           |
|                   | Borland 2014   | 48                           | Sweden   | Int: 70 (6)<br>Con: 71 (9)            | Int: 20/5 (M/F)<br>Con: 18/5 (M/F)     | NA                               | Chronic heart failure class II-III         | Yes                                                                          |
|                   | Bjorgaas 2008  | 48                           | Norway   | Int: 56.4 (11);<br>Con: 61.2 (9.7)    | Int: 9/14 (F/M);<br>Con: 8/17 (F/M)    | NR                               | Type 2 diabetes diagnosed (Under 80 years) | Int (6/23), Con (8/25) had other metabolic disease(s) but were none reported |
|                   | Cayir 2015     | 84                           | Turkey   | Int: 41.1 (9.3);<br>Con: 38.8 (11.2)  | 100% Female                            | NR                               | Obese                                      | No                                                                           |
|                   | Cupples 2013   | 45                           | UK       | Int: 61.6 (11.3);<br>Con: 59.2 (8.9)  | 91% Male                               | NR                               | Cardiac rehabilitated participants         | No                                                                           |
|                   | Dasgupta 2017  | 347                          | Canada   | Int: 60 (11.2);<br>Con: 59.4 (11.4)   | Int: 56.9%F<br>Con: 52.6%F             | Int: 63.6% white; Con: 57% white | Type 2 diabetes or hypertension or both    | No                                                                           |
|                   | De Greef 2010  | 41                           | Belgium  | NR                                    | 68% Male                               | NR                               | Type 2 diabetes diagnosed over 6 months    | No                                                                           |
|                   | De Greef 2011* | 47                           | Belgium  | Overall: 67.4 (9.3)                   | 70.1% Male; 29.9% Female               | NR                               | Type 2 diabetes diagnosed                  | No                                                                           |

|                       |                  |     |               |                                          |                                        |                                     |                                                                |                                            |
|-----------------------|------------------|-----|---------------|------------------------------------------|----------------------------------------|-------------------------------------|----------------------------------------------------------------|--------------------------------------------|
|                       | Diedrich 2010    | 32  | US            | Int: 56.68 (13.62);<br>Con: 54.88 (9.79) | NR                                     | NR                                  | Type 2 diabetes diagnosed                                      | No                                         |
|                       | Engel 2006       | 50  | Australia     | Int: 60.5 (7.34);<br>Con: 64 (6.76)      | Int: 13M, 11F;<br>Con: 15M, 15F        | NR                                  | Type 2 diagnosed                                               | High number of obese participants included |
|                       | Fayehun 2018     | 46  | Nigeria       | NR                                       | 63% Female; 37% Male                   | 91.3% Yoruba,<br>8.7% others        | Type 2 diabetes mellitus diagnosed                             | No                                         |
|                       | Izawa 2012       | 126 | Japan         | Int: 59.2 (8.2)<br>Con: 59.1 (12.8)      | Int: 79%, Con: 82% Male                | NA                                  | Cardiac rehabilitation                                         | No                                         |
|                       | Katzmarzyk 2011  | 43  | US            | Int: 52.7 (8.8);<br>Con: 50.3 (7.7)      | Int: 20%M;<br>Con: 13%M                | Int: 70% White;<br>Con: 73.9% white | Overweight/Obese (BMI 25-35)                                   | No                                         |
|                       | Reid 2011        | 223 | Canada        | 56.4 (9)                                 | 188/223 (84.3%) Male                   | NR                                  | Acute coronary syndromes                                       | Yes                                        |
|                       | Tudor-Locke 2004 | 47  | Canada        | Overall: 52.7 (5.2)                      | 26 male; 11 female                     | NR                                  | Type 2 diagnosed (BMI 33.3 +/- 5.6)                            | No                                         |
|                       | Van Dyck 2013    | 92  | Belgium       | Overall: 62 (9)                          | 69% male                               | NR                                  | Type 2 diagnosed > 5 years and BMI 30 +/- 2.8                  | Yes                                        |
| <b>Accelerometer:</b> | Baillot 2018     | 25  | Canada        | Int: 44.5 (8.8);<br>UC: 41.1 (10.3)      | Int: 84.6%F;<br>UC: 75%F               | NR                                  | Obese patients (BMI > 35 kg/m <sup>2</sup> ) and comorbidities | Yes                                        |
|                       | Christle 2017    | 70  | Germany       | 70 (9)                                   | 28/70 (39)F                            | NR                                  | Cardiac disease                                                | Yes                                        |
|                       | Cowie 2011       | 60  | UK (Scotland) | 66 (Range: 35-85)                        | 51 (85%)/9 (15%) M/F                   | NR                                  | Chronic heart failure class II-III                             | Yes                                        |
|                       | De Greef 2011    | 67  | Belgium       | Overall: 62 (IQR 9)                      | 69% Male                               | NR                                  | Type 2 diabetes diagnosed                                      | No                                         |
|                       | Devi 2014        | 94  | UK            | Int: 66.3 (8.3)<br>Con: 66.2 (10.1)      | Int: 14/35 (39%)F<br>Con: 14/35 (39%)F | Int: 92%<br>Con: 91%                | Coronary heart disease                                         | No                                         |
|                       | Frederix 2015    | 139 | Belgium       | 61 (9)                                   | 25/139 (18%) F                         | No                                  | Coronary artery disease or heart failure                       | Yes                                        |

|               |      |          |                                                            |                                                   |                                                                                                                                           |                                                     |                            |
|---------------|------|----------|------------------------------------------------------------|---------------------------------------------------|-------------------------------------------------------------------------------------------------------------------------------------------|-----------------------------------------------------|----------------------------|
| Greaney 2017  | 181  | US       | Int: 36.62 (5.07);<br>UC: 35.62 (5.76)                     | 100% female                                       | 100% Black                                                                                                                                | Overweight/Obese<br>(Low SES black women)           | No                         |
| Guiraud 2012  | 29   | France   | 57.4 (12.4)                                                | 5/29 (17%)F                                       | NR                                                                                                                                        | Coronary artery disease or heart failure            | Yes                        |
| Holliday 2018 | 19   | UK       | Overall: 41 (2)                                            | 100% Female                                       | NR                                                                                                                                        | Overweight/Obese                                    | No                         |
| Houle 2011/12 | 65   | Canada   | Int: 58 (8)<br>Con: 59 (9)                                 | 14/65 (21.5%)F                                    | NR                                                                                                                                        | Acute coronary syndrome                             | No                         |
| Kirk 2009     | 127  | UK       | Int1: 60.9 (9.6);<br>Int2: 63.2 (10.6);<br>UC: 59.2 (10.4) | Int1: 53%M/47%F;<br>Int2: 42%/58%;<br>UC: 51%/49% | NA                                                                                                                                        | Type 2 diabetes                                     | No                         |
| Miyamoto 2017 | 31   | Japan    | LPA: 61.7 (1.9);<br>N-LPA: 60 (3.1);<br>Con: 60.2 (3)      | LPA: 9M/2F;<br>N-LPA: 9M/3F;<br>Con: 8M/2F        | NA                                                                                                                                        | More than 1 year after diagnosis of type 2 diabetes | No                         |
| Paschali 2005 | 26   | US       | Int: 48.8 (6.1);<br>Con: 47 (7.2)                          | 53% female in each group                          | NR                                                                                                                                        | Obese adults with type 2 diabetes                   | No                         |
| Pekmezi 2017  | 76   | US       | Overall: 57 (4.7)                                          | 100% Female                                       | 100% African American women                                                                                                               | Overweight/Obese                                    | No                         |
| Ribeiro 2017  | 138  | Portugal | Int: 54 (9)<br>Con: 58 (9)                                 | Int: 23/71 (32%)F<br>Con: 20/67 (30%)F            | NR                                                                                                                                        | Myocardial infarction                               | Yes                        |
| Unick 2016    | 1763 | US       | Overall: 59.3 (6.85)                                       | 55.8% Female                                      | 19.6% African American,<br>0.75% native American,<br>0.71% Asian/pacific islander,<br>5.04% Hispanic/Latino,<br>71.6% non-Hispanic white, | Diabetes type 2 diagnosed                           | 15.2% had a history of CVD |

|  |            |     |                  |                     |               |                         |                                                                                                                                                                                                                                              |         |
|--|------------|-----|------------------|---------------------|---------------|-------------------------|----------------------------------------------------------------------------------------------------------------------------------------------------------------------------------------------------------------------------------------------|---------|
|  |            |     |                  |                     |               | 2.29%<br>other/multiple |                                                                                                                                                                                                                                              |         |
|  | Unick 2017 | 235 | US               | Overall: 59.7 (6.8) | 55% female    | 76% Caucasian           | Diabetes type 2<br>and BMI (35.5 +/-<br>5.9)                                                                                                                                                                                                 | No      |
|  | Yates 2017 | 571 | UK               | Overall: 62.6 (8.2) | 65.5% Male    | 86.8% White<br>European | Individuals aged<br>between 18 and<br>74 years of age<br>were inclusive if<br>they score above<br>the 90th<br>percentile on the<br>risk calculator (a<br>non-invasive risk<br>calculator for risk<br>of developing type<br>2 dm in subjects) | Unclear |
|  | Young 2016 | 105 | US<br>(Nebraska) | 70.2 (12.2)         | 70/105 (67%)F | 95% White               | Heart failure (Class<br>II-IV)                                                                                                                                                                                                               | Yes     |

**eTable 3 – Summary of intervention characteristics by study**

|                   | <b>Study author</b> | <b>Aims of intervention</b>                                                                                                                                                          | <b>Theoretical approach</b> | <b>Intervention components</b>                                                                      | <b>Control components</b>                                                              | <b>Delivery method (including format and provider)</b>                                                       | <b>Number of sessions (time of each session)</b> | <b>Length of intervention (weeks)</b> | <b>Goals setting and uptake</b> |
|-------------------|---------------------|--------------------------------------------------------------------------------------------------------------------------------------------------------------------------------------|-----------------------------|-----------------------------------------------------------------------------------------------------|----------------------------------------------------------------------------------------|--------------------------------------------------------------------------------------------------------------|--------------------------------------------------|---------------------------------------|---------------------------------|
| <b>Pedometer:</b> | Anderson 2015       | To evaluate the effect of pedometer tracking on exercise adherence among post-Cardiac rehabilitation patients in a randomized study with control participants engaging in usual care | NR                          | Pedometer worn daily with log book use to record steps                                              | NR                                                                                     | Unsupervised pedometer tracking after CR is complete. By specialist staff                                    | 1 at the beginning of the study                  | 12                                    | NA<br>NR                        |
|                   | Araiza 2006         | Determine whether a recommendation to accumulate 10,000 steps per day would result in significant improvements in parameters of glycaemic                                            | NA                          | Each participant wore a pedometer throughout the day and was trained how to use it. Pedometers were | Instructed to maintain their normal activity habits throughout the 6 week intervention | In active group participants were instructed to walk 10,000 steps on 5 or more days of the week for 6 weeks. | NA - self monitored                              | 6                                     | NA<br>NR                        |

|               |                                                                                                                                                |                                                                                                                   |                                                                                                                   |                                                                                                                            |                                                                                 |                                                                                    |          |                                                                                                      |  |
|---------------|------------------------------------------------------------------------------------------------------------------------------------------------|-------------------------------------------------------------------------------------------------------------------|-------------------------------------------------------------------------------------------------------------------|----------------------------------------------------------------------------------------------------------------------------|---------------------------------------------------------------------------------|------------------------------------------------------------------------------------|----------|------------------------------------------------------------------------------------------------------|--|
|               |                                                                                                                                                | control, insulin sensitivity, cardiovascular risk and oxidative stress in sedentary patients with type 2 diabetes |                                                                                                                   | positioned on the waist. Steps were recorded in an activity log.                                                           |                                                                                 |                                                                                    |          |                                                                                                      |  |
| Borland 2014  | To investigate the impact of group-based exercise on physical activity levels in patients with coronary heart failure (CHF)                    | NA                                                                                                                | Participants instructed to wear the pedometer throughout the day and register the steps on a log sheet at bedtime | Participants asked to continue with usual lives                                                                            | Device attached at waist for 7 days at baseline and at 3 months                 | Group-based exercise programme comprised 60-min sessions twice a week for 3 months | 12 weeks | NA<br>NR                                                                                             |  |
| Bjorgaas 2008 | Determine whether regular use of pedometers increases walking and/or enhances health related beneficial effect in type 2 diabetic participants | NA                                                                                                                | Pedometer and log book 3 weekdays twice per month                                                                 | Participants were encouraged to increase the average daily time spent walking from one visit to another, guided by logbook | Participants meet FTF with study nurse baseline, 1 month, 3 months and 6 months | NR                                                                                 | 26       | Goals were set at every nurse meeting after baseline<br><br>68% completion rate amongst participants |  |
| Cayir 2015    | Whether or not pedometers as a motivational                                                                                                    | NA                                                                                                                | Intervention group given a low-calorie                                                                            | Control group given a low-calorie diet                                                                                     | Face-to-face interviews with                                                    | NR                                                                                 | 13       | NA                                                                                                   |  |

|  |               |                                                                                                                                |    |                                                                                                                  |                                                                                          |                                                                                                                |                                                                                                                             |    |                                                                                                    |
|--|---------------|--------------------------------------------------------------------------------------------------------------------------------|----|------------------------------------------------------------------------------------------------------------------|------------------------------------------------------------------------------------------|----------------------------------------------------------------------------------------------------------------|-----------------------------------------------------------------------------------------------------------------------------|----|----------------------------------------------------------------------------------------------------|
|  |               | technique can increase the levels of physical activity in Obese women and impact on weight loss                                |    | diet and exercise with pedometer. Daily steps were recorded through interviews at a 5-day intervals              | and exercise (no pedometer)                                                              | facilitators at 15 day intervals                                                                               |                                                                                                                             |    | 84% completion rate amongst participants                                                           |
|  | Cupples 2013  | Examine the use of pedometer step count goals to promote physical activity for cardiac rehabilitation patients                 | NA | Pedometer, dairy to record step counts with feedback from facilitator                                            | Facilitator recorded baseline pedometer data but no feedback information was given       | Face-to-face or by telephone, facilitator contact made weekly                                                  | Weekly contact with the facilitator                                                                                         | 6  | Gradual 10% increase in average daily count aiming for 10,000 steps/day<br><br>93% completion rate |
|  | Dasgupta 2017 | Impact of intervention on physical activity, but also gauge biological effects by evaluating several cardio-metabolic measures | NA | To achieve a net increase over baseline of 3000 steps/day over 1 year using a pedometer, step count log and step | Received advice to engage in 30 to 60 mins of activity daily, consistent with usual care | Participants were typically seen by their physician in a clinical setting 3-4 times over a 12-15 month period. | 3-4 times over a 12-15 month period. Time per session unclear for intervention group, in control group they were engaged in | 52 | 3000 steps/day increase over 1 year<br><br>79% completion rate                                     |



|                |                                                                                                                                                                  |                               |                                                                                     |                                                                                                                                                                              |                                                                                                                   |                                                                                                                                                                    |                        |                                                                  |  |
|----------------|------------------------------------------------------------------------------------------------------------------------------------------------------------------|-------------------------------|-------------------------------------------------------------------------------------|------------------------------------------------------------------------------------------------------------------------------------------------------------------------------|-------------------------------------------------------------------------------------------------------------------|--------------------------------------------------------------------------------------------------------------------------------------------------------------------|------------------------|------------------------------------------------------------------|--|
|                |                                                                                                                                                                  |                               |                                                                                     | count prescription                                                                                                                                                           |                                                                                                                   |                                                                                                                                                                    | 30-40 mins of activity |                                                                  |  |
| De Greef 2010  | Investigate the benefits of a pedometer and a cognitive behavioural intervention for promoting PA in type 2 diabetes patients                                    | Cognitive-behavioural therapy | Received pedometer and a pedometer diary during intervention as motivational tools. | Received usual care from their endocrinologist and a single education session about type 2 diabetes and PA which was the same as the first session of the intervention group | Group meetings which involved motivational interviewing, then an implementation plan were developed with coaches. | 90-min group meetings, first three given every 2 weeks, the last two sessions were given over interval of 3 and 4 weeks.                                           | 12                     | At each session coaches set new goals<br><br>75% compliance rate |  |
| De Greef 2011* | Investigate whether a 12-week pedometer based PA intervention delivered by a trained GP individually can be as effective as group delivery by behavioural expert | NA                            | Pedometer and diary to keep log of type of PA, duration and number of steps/day     | No intervention, only received general care from GP                                                                                                                          | face-to-face delivery by GP or behaviour expert                                                                   | 90-min group counselling sessions over a 12 week period (one session every 3 weeks). Participant in the GP delivered group received three 15-min FTF consultations | 12                     | NA<br><br>NR                                                     |  |

|               |                                                                                                                                                                                                                         |    |                                                                                                                                   |                                                                                                            |                                                                                                                                                                                                                            |                                                                  |    |                                                                                                                                   |
|---------------|-------------------------------------------------------------------------------------------------------------------------------------------------------------------------------------------------------------------------|----|-----------------------------------------------------------------------------------------------------------------------------------|------------------------------------------------------------------------------------------------------------|----------------------------------------------------------------------------------------------------------------------------------------------------------------------------------------------------------------------------|------------------------------------------------------------------|----|-----------------------------------------------------------------------------------------------------------------------------------|
| Diedrich 2010 | To see whether the self-help Manpo-Kei program can be a solution to promoting exercise in people with diabetes without adding significant content and activities to a diabetes self-management education (DSME) program | NR | Received a copy of the Manpo-Kei (guide to steps) book and concise handout summarizing the key points of the book and a pedometer | Attended usual DSME programs only                                                                          | Initial FTF assessment by certified diabetes educators prior to attending first DSME program session. Questionnaires mailed out at 3 months. Telephone calls also made to participants to set up the follow-up appointment | DSME includes a 2 - hour assessment and 8 hours of group classes | 13 | NA<br><br>62% completion rate                                                                                                     |
| Engel 2006    | Investigate the impact of using a pedometer on time spent walking                                                                                                                                                       | NR | Pedometer and exercise log to record the number of steps each day                                                                 | Health-related coaching including behaviour change strategies to improve self efficiency like goal setting | 6 face-to-face visits or contacts by facilitator during the 6 months of study                                                                                                                                              | 6 visits each the time varied                                    | 26 | 6000-8500 steps/d for healthy older adults and 3500-5500 steps/d for older adults with chronic illnesses were considered as goals |

|                 |                                                                                                                                                                               |                                                      |                                                                                                                                                                  |                                                                      |                                                                            |                                                                                                                                      |    |                                                                             |
|-----------------|-------------------------------------------------------------------------------------------------------------------------------------------------------------------------------|------------------------------------------------------|------------------------------------------------------------------------------------------------------------------------------------------------------------------|----------------------------------------------------------------------|----------------------------------------------------------------------------|--------------------------------------------------------------------------------------------------------------------------------------|----|-----------------------------------------------------------------------------|
| Fayehun 2018    | To evaluate whether 10,000 steps per day is believed to be a reasonable estimate of daily activity for healthy adults                                                         | NA                                                   | Pedometer and manual record for recording daily step counts                                                                                                      | Continued with typical daily activities                              | Face-to-face and telephone                                                 | Face-to-face counselling each week until they reached 10,000 steps per day, telephone follow-up was also given at weeks 2, 6 and 10. | 10 | To accumulate 10,000 steps per day for 10 weeks.<br><br>85% completion rate |
| Izawa 2012      | To evaluate the effect of a self-monitoring approach on physical activity begun during an acute phase I CR program and continued until the beginning of a phase II CR program | Trans theoretical model of exercise behaviour change | The Kenz Lifecorder EX records number of steps taken and after 8 days of continuous wear, the device was retrieved, and the data were downloaded into a computer | Usual daily physical activity measured                               | Self-monitoring meet with interventionist at beginning and end of trial    | Results collected after 7 days of recording PA                                                                                       | 1  | NA<br><br>82% completion rate                                               |
| Katzmarzyk 2011 | To assess whether a pedometer-based educational intervention                                                                                                                  | NA                                                   | Received the same educational materials, but were given the YAMAX                                                                                                | Education group only received a brochure detailing the importance of | Self-monitored daily with instructions to engage in usual activity then to | Participants recorded their daily steps in a log sheet                                                                               | 2  | NA<br><br>80% completion rate                                               |

|  |                  |                                                                                                                                                                                                                              |                                                                             |                                                                                                                |                                                                                            |                                                                                                                       |                                                                                                                                                                     |    |                                                         |
|--|------------------|------------------------------------------------------------------------------------------------------------------------------------------------------------------------------------------------------------------------------|-----------------------------------------------------------------------------|----------------------------------------------------------------------------------------------------------------|--------------------------------------------------------------------------------------------|-----------------------------------------------------------------------------------------------------------------------|---------------------------------------------------------------------------------------------------------------------------------------------------------------------|----|---------------------------------------------------------|
|  |                  | could increase MVPA in short term and to assess whether change in steps/day is associated with change in MVPA                                                                                                                |                                                                             | Digi-Walker SW-200 pedometer to record steps                                                                   | physical activity for maintaining health and guidance on how to increase physical activity | increase. Facilitator not involved in delivery of intervention                                                        |                                                                                                                                                                     |    |                                                         |
|  | Reid 2011        | To investigated whether patients who used the CardioFit programme were more physically active 6 and 12 months following hospitalization for CHD than patients who received physical activity advice from their cardiologist. | NA                                                                          | Visited in hospital by exercise specialist, who present personal PA advice and how to use the CardioFit system | Received PA guidance from their attending cardiologist and an education booklet            | Participant were asked to log daily activity on website and complete 5 online tutorials (at weeks 2, 4, 8, 14 and 20) | Online tutorials took place (at weeks 2, 4, 8, 14 and 20). Tutorial took about 10-20 mins to complete. Between tutorial participants received emails for motivation | 52 | NR<br><br>69% completion rate                           |
|  | Tudor-Locke 2004 | To assess if first step program is associate with improvements in physical activity (steps per day) and whether increased                                                                                                    | Program based on theoretical principles of self-efficacy and social support | Pedometers provided and the program manual containing goal setting and problem solving                         | Received postcards thanking participants for taking part in the study.                     | Face-to-face assessments at meeting                                                                                   | Initial 4 weeks participants were asked to attend four weekly group meetings, remaining 12 weeks                                                                    | 16 | Increase PA > 3000 steps/day<br><br>78% completion rate |

|                       |               |                                                                                                                                                             |                                                                                |                                                                                                                                                                                                              |                                            |                                                                                                             |                                                                                         |    |                               |
|-----------------------|---------------|-------------------------------------------------------------------------------------------------------------------------------------------------------------|--------------------------------------------------------------------------------|--------------------------------------------------------------------------------------------------------------------------------------------------------------------------------------------------------------|--------------------------------------------|-------------------------------------------------------------------------------------------------------------|-----------------------------------------------------------------------------------------|----|-------------------------------|
|                       |               | physical activity was related to improvements in cardiovascular health, glycaemic control and lipid profiles                                                |                                                                                | exercises, as well as calendars for self-monitoring steps/day                                                                                                                                                |                                            |                                                                                                             | participants asked to use pedometers and calendars for goal setting and self-monitoring |    |                               |
|                       | Van Dyck 2013 | Examine the effects of physical activity program were mediated by theoretical constructs targeted by the intervention, both post-intervention and at 1 year | Intervention based on self-determination theory and the transtheoretical model | Accelerometer, pedometer and IPAQ. Pedometer and accelerometer were worn at the waist during waking hours for 7 days. Activity log was used to record step taken and the type duration of walking activities | Unclear                                    | Face-to-face session, pedometer use and seven phone calls (tailored motivational interviewing)              | Telephone calls ranged from 15 to 20 min spread over a 24 week period                   | 24 | NA<br><br>96% completion rate |
| <b>Accelerometer:</b> | Baillet 2018  | To compare changes from baseline to 1 year after bariatric surgery (BS) in PA, physical fitness, PA barriers, and                                           | NR                                                                             | Objectively measured PA was assessed with a accelerometer attached to the right hip during all                                                                                                               | Non supervised exercise training before BS | Counselling sessions every 6-8 weeks before BS during at least 6 months with a dietitian and PA specialist. | The PreSET group underwent three weekly 80-min sessions consisting of 10-min of         | 12 | NA<br><br>83% completion rate |

|               |                                                                                                                                                                                   |                                                                                           |                                                                                    |                                                                                                                                                                      |                                                                                                                                        |                                                                                                                                                  |                                                                                                                                                                                                                              |                                |  |
|---------------|-----------------------------------------------------------------------------------------------------------------------------------------------------------------------------------|-------------------------------------------------------------------------------------------|------------------------------------------------------------------------------------|----------------------------------------------------------------------------------------------------------------------------------------------------------------------|----------------------------------------------------------------------------------------------------------------------------------------|--------------------------------------------------------------------------------------------------------------------------------------------------|------------------------------------------------------------------------------------------------------------------------------------------------------------------------------------------------------------------------------|--------------------------------|--|
|               |                                                                                                                                                                                   | quality of life between the pre-surgical exercise training (PreSET) and usual care groups |                                                                                    | waking hours 7 days after the 1 years assessment. This data were collected in a diary completed daily by participants and then extracted using active life software. |                                                                                                                                        | IPAQ-SF questionnaire used to record number of minutes of walking, MVPA and sitting time during the last 7 days a self-reported by participants. | warm-up, 30 min of endurance activity at 55 to 85% heart rate, 20 to 30 min of strength exercises with small equipment and 10 min of a cool-down period, with monthly aqua-gym session, which lasted until 2 weeks before BS |                                |  |
| Christle 2017 | To compare 6-month individualised combined exercise (ICE) versus cardiac rehabilitation maintenance programs (CMP) on the effects on leisure and PA and HRQoL in elderly patients | NR                                                                                        | Accelerometer worn on the hip to measure number of steps and moderate PA over time | Performed exercise in a state-sanctioned cardiac rehabilitation group. This form of exercise-based secondary prevention is considered                                | Daily physical activity level was determined using the International Physical Activity Questionnaire (IPAQ) and triaxial accelerometry | ICE performed for approx. 60 mins and include 30 min of MVPA                                                                                     | 26                                                                                                                                                                                                                           | NA<br><br>100% completion rate |  |

|               |                                                                                                                                                                 |                                                                                                                      |                                                                                                               |                                                                                                 |                                                                                       |                                                                  |    |                                    |                                                           |
|---------------|-----------------------------------------------------------------------------------------------------------------------------------------------------------------|----------------------------------------------------------------------------------------------------------------------|---------------------------------------------------------------------------------------------------------------|-------------------------------------------------------------------------------------------------|---------------------------------------------------------------------------------------|------------------------------------------------------------------|----|------------------------------------|-----------------------------------------------------------|
|               |                                                                                                                                                                 | with cardiac disease and low exercise capacity                                                                       |                                                                                                               |                                                                                                 | phase III aftercare                                                                   |                                                                  |    |                                    |                                                           |
| Cowie 2011    | To compare immediate and long-term effects of home and hospital-based aerobic exercise training upon PA level in heart failure, as measured by an accelerometer | NA                                                                                                                   | Accelerometer (ActivePal) attached to front thigh for one week. Participant encourage to do shuttle walk test | Advised to adhere to their usual heart failure nursing care and daily routines                  | The session was physiotherapist-led, while DVD and booklet was created for home group | 1 hour aerobic exercise sessions for active intervention groups. | 8  | NR                                 | Training adherence: 86% hospital based and 77% home-based |
| De Greef 2011 | To promote PA and decreasing sedentary behaviour                                                                                                                | Cognitive-behavioural therapy, the diabetes prevention program, the first step program and motivational interviewing | face-to-face session, a pedometer and telephone support                                                       | No intervention                                                                                 | face-to-face sessions and telephone support                                           | Seven call into total and one interview                          | 24 | >10,000 steps/day                  | 96% completion rate                                       |
| Devi 2014     | To assess the clinical effectiveness of this independent Internet-delivered self-managed "rehabilitation"                                                       | MacNew: social and emotional scores                                                                                  | Primary outcome measured using an accelerometer                                                               | Continued with treatment as usual from their GP and received no further contact from researcher | Delivered via internet                                                                | Each session lasted 40 minutes.                                  | 6  | Tailored goals focused on exercise | 89% completed the 6-week follow-up                        |

|               |                                                                                                                                                                        |                                                                              |                                                                                                                                                 |                                                                                                                                         |                                                                                                                                                    |                                                                                                               |    |                                                                                                 |  |
|---------------|------------------------------------------------------------------------------------------------------------------------------------------------------------------------|------------------------------------------------------------------------------|-------------------------------------------------------------------------------------------------------------------------------------------------|-----------------------------------------------------------------------------------------------------------------------------------------|----------------------------------------------------------------------------------------------------------------------------------------------------|---------------------------------------------------------------------------------------------------------------|----|-------------------------------------------------------------------------------------------------|--|
|               |                                                                                                                                                                        | program in a population with chronic stable angina in a primary care setting |                                                                                                                                                 |                                                                                                                                         | until the 6 week follow-up.                                                                                                                        |                                                                                                               |    |                                                                                                 |  |
| Frederix 2015 | To assess medium-term effectiveness of a patient-specific, comprehensive cardiac tele-rehabilitation program in addition to standard ambulatory cardiac rehabilitation | NA                                                                           | Yorbody accelerometer motion sensor used, internet-based tele-rehabilitation in addition to Centre-based rehabilitation                         | Centre-based rehabilitation alone                                                                                                       | Psychologist aimed to improve patient self-efficiency to change prior lifestyle. SMS message sent out to provide motivational content              | At least 2 exercise training sessions per week. Patients instructed to exercise for 45 to 60 mins per session | 24 | Predefined exercise training goal disseminated via SMS<br><br>90% complete the study as planned |  |
| Greaney 2017  | Examine the impact of the shape program, a weight gain prevention program designed for black overweight or obese women living in the rural South                       | Social cognitive theory with self-efficacy as primary mediator               | Individuals randomized received, a) tailored behaviour change goals to promote the prevention of weight gain, skills training materials, weekly | Participants were mailed semi-annual newsletters during the intervention period. The newsletter covered general wellness topics but not | Coaching calls and motivational interviewing. Printed skills training material were provided to participants with assigned behaviour change goals. | Measurements taken at baseline and 12 months. Sessions of PA were summaries into 1- and 10-min bouts of MVPA  | 52 | Tailored behaviour change goals and step goals<br><br>62% completion rate                       |  |



|              |                                                                                                                                                                                                   |    |                                               |                                                                                                                                                                                                   |                                                                                                                                                                                   |                                                                                                            |   |                                                                                       |  |
|--------------|---------------------------------------------------------------------------------------------------------------------------------------------------------------------------------------------------|----|-----------------------------------------------|---------------------------------------------------------------------------------------------------------------------------------------------------------------------------------------------------|-----------------------------------------------------------------------------------------------------------------------------------------------------------------------------------|------------------------------------------------------------------------------------------------------------|---|---------------------------------------------------------------------------------------|--|
|              |                                                                                                                                                                                                   |    |                                               | interactive voice response (IVR) telephone calls for self-monitoring, monthly telephone coaching from a registered dietitian and a no-cost 12 month membership to a YMCA facility of their choice | PA, nutrition of weight                                                                                                                                                           |                                                                                                            |   |                                                                                       |  |
| Guiraud 2012 | Assess the efficacy of a strategy, based on telephone support oriented by accelerometer measurements, on the adherence to PA recommendations in cardiac patients not achieving PA recommendations | NR | Accelerometer used to measure all PA outcomes | PA measured with accelerometer during the 8 <sup>th</sup> week of testing period                                                                                                                  | PA measurements were recorded during a period of 2 months. Kinesiologist insisted on the importance of wearing the accelerometer. Each session was monitored by a physiotherapist | Patients participated in 45-minute fitness, gymnastics, relaxation, Qi Gong, or aquatic training sessions. | 8 | Goal setting for 2 weeks for EE outcome<br><br>69% of participants complete the trial |  |

|               |                                                                                                                             |                                   |                                                                                                                                                                                                                                  |                                                                                             |                                                                                                                                                                                                                                                                                                    |                                                                               |    |                                                                  |  |
|---------------|-----------------------------------------------------------------------------------------------------------------------------|-----------------------------------|----------------------------------------------------------------------------------------------------------------------------------------------------------------------------------------------------------------------------------|---------------------------------------------------------------------------------------------|----------------------------------------------------------------------------------------------------------------------------------------------------------------------------------------------------------------------------------------------------------------------------------------------------|-------------------------------------------------------------------------------|----|------------------------------------------------------------------|--|
|               |                                                                                                                             |                                   |                                                                                                                                                                                                                                  |                                                                                             |                                                                                                                                                                                                                                                                                                    | or kinesiologist and supervised by a cardiologist                             |    |                                                                  |  |
| Holliday 2018 | Investigate the effect of a points based approach to PA on body weight and composition in inactive women who are overweight | NR                                | StructEx group undertake 5 x 30 min of moderate intensity exercise per week. PBPA group were provided with a table of examples of different activities each allocated a point's score. Point values were derived from MET scores | CONT condition were instructed to maintain their current lifestyle for 24 week study period | Self-report PA was recorded by participants using hard copy activity diary. PA points and minutes of exercise were recorded by those in both interventions groups with weekly totals calculated for monitoring. Objectively measured PA was assessed using the GT3X accelerometer (acti-graph, FL) | NR                                                                            | 24 | NA<br>76% completion rate                                        |  |
| Houle 2011/12 | To evaluate the impact of a home-based cardiac rehabilitation program led by a clinical nurse                               | Social cognitive theory framework | Participants given pedometer (Yamax Digiwalker SW-200), diary and                                                                                                                                                                | Provided with standard advice on PA at discharge                                            | Intervention delivered FTF by clinical nurse specialist before hospital discharge                                                                                                                                                                                                                  | Follow-up sessions included one phone call within 2 weeks after discharge and | 52 | Intervention includes a goal setting element with target > 3,000 |  |

|               |                                                                                                                                                                                |                                                                                      |                                                                                                                        |                                                                                                                                                   |                                                                                                                  |                                                                                                                         |                                                                                                                |                               |                                                    |
|---------------|--------------------------------------------------------------------------------------------------------------------------------------------------------------------------------|--------------------------------------------------------------------------------------|------------------------------------------------------------------------------------------------------------------------|---------------------------------------------------------------------------------------------------------------------------------------------------|------------------------------------------------------------------------------------------------------------------|-------------------------------------------------------------------------------------------------------------------------|----------------------------------------------------------------------------------------------------------------|-------------------------------|----------------------------------------------------|
|               |                                                                                                                                                                                | specialist on PA behaviour at 3, 6, 9 and 12 months after an acute coronary syndrome |                                                                                                                        | information regarding PA after an acute coronary syndrome                                                                                         |                                                                                                                  |                                                                                                                         | 5 FTF consultations (at 6 weeks and 3, 6, 9 and 12 months after the event). Sessions lasted between 30-60 mins |                               | steps/d at baseline<br><br>69% completed the trial |
| Kirk 2009     | To assess whether those randomised to PA consultation delivered by a person or in written form increase PA levels over 6 and 12 months                                         | Transtheoretical model of behaviour change                                           | Self-instructional workbook included a pedometer                                                                       | Received a two page information leaflet by Tayside Diabetes network.                                                                              | FTF consultation, workbook, follow-up phone calls                                                                | 30 min FTF consultation with trained researcher at baseline and 6 months                                                | 52                                                                                                             | NA<br><br>87% completion rate |                                                    |
| Miyamoto 2017 | Whether the use of tri-axial accelerometer can reduce sedentary time and increase non locomotive physical activity (LPA) and to investigate the effect of this intervention on | NA                                                                                   | All participants wore a tri-axial accelerometer during intervention period and were given verbal instruction regarding | No instruction given in control group regarding physical activity, they wore a accelerometer but display was turned off so they could not receive | Visual feedback given to intervention groups and encouragement was provided by physical therapist to increase PA | Face-to-face meeting at start of intervention and at 4- and 8- week follow-up examinations. Time at meetings unreported | 12                                                                                                             | NA<br><br>97% completion rate |                                                    |

|               |                                                                                                                                                          | parameters of glucose and fat metabolism in type 2 diabetes |                                                                                                                                                                                                                               | their objectives                                                                                                                         | any visual feedback                                                                                                                              |                                                                                                 |    |                                                                     |  |
|---------------|----------------------------------------------------------------------------------------------------------------------------------------------------------|-------------------------------------------------------------|-------------------------------------------------------------------------------------------------------------------------------------------------------------------------------------------------------------------------------|------------------------------------------------------------------------------------------------------------------------------------------|--------------------------------------------------------------------------------------------------------------------------------------------------|-------------------------------------------------------------------------------------------------|----|---------------------------------------------------------------------|--|
| Paschali 2005 | To assess whether giving activity feedback to obese, sedentary adults with type 2 diabetes would improve their adherence to a home based walking program | NA                                                          | Home-based intervention where participants received a manual containing instructions on self-regulation of exercise intensity and on behavioural self-management. Focus on accelerometer data which was processed by computer | Counselling session has the same structure as intervention, but review of the past months exercise relied upon data in the subject diary | Participant received a manual at start of intervention. Individual counselling sessions with behaviour therapist structured sessions we provided | 8 counselling sessions, length not reported                                                     | 12 | NA<br>NR                                                            |  |
| Pekmezi 2017  | To assess whether women assigned to the Home-based, Individually-tailored Physical activity Print (HIPP)                                                 | Social cognitive theory and the transtheoretical model      | Accusplit pedometers and activity logs provided to encourage self-monitoring of                                                                                                                                               | Received mailings with cancer prevention information on topics other than PA. These were                                                 | For self-reported data participants wore accelerometers on their hip for 7 consecutive                                                           | Accelerometer worn at all times over the 7 days baseline. Contact time at 6 months not reported | 26 | Goal setting used to measure self-regulation nature of intervention |  |

|              |                                                                                                                                      |                                                                                                                            |                                                                                                                                  |                                                                |                                                                                                                               |                                                                                                                                               |     |                                                                                |                                                         |
|--------------|--------------------------------------------------------------------------------------------------------------------------------------|----------------------------------------------------------------------------------------------------------------------------|----------------------------------------------------------------------------------------------------------------------------------|----------------------------------------------------------------|-------------------------------------------------------------------------------------------------------------------------------|-----------------------------------------------------------------------------------------------------------------------------------------------|-----|--------------------------------------------------------------------------------|---------------------------------------------------------|
|              |                                                                                                                                      | intervention would greater increase PA and related psychosocial variables at 6 months when compared with the control group |                                                                                                                                  | exercise behaviour.                                            | received at time points identical to those of the intervention group                                                          | days at baseline and 6 months (contact with trial investigators). Accelerometers were mailed to participants                                  |     |                                                                                | 61% returned at least three of the four updated surveys |
| Ribeiro 2017 | Assess the effects of an exercise-based cardiac rehabilitation programme on daily physical activity levels of patients following MI. | NA                                                                                                                         | PA objectively measured with accelerometer (Actigraph GT1M) over 7 days. This device was attached to right hip with elastic band | Regular appointment with cardiologist and optimised medication | Education counselling provided by cardiologist and in the exercise programme via the physician and a physiotherapist          | 3 supervised sessions per week for 8 weeks each 50 mins (10 min worm-up, 30 mins aerobic exercise on cycle or treadmill and 10 min cool-down) | 8   | NA<br><br>93% completion rate                                                  |                                                         |
| Unick 2016   | Examine the MVPA differences between participants who received intensive lifestyle intervention (ILI) vs. Diabetes                   | NA                                                                                                                         | Accelerometer used to record PA                                                                                                  | Participants provided with diabetes support and education.     | 1 Face-to-face counselling session, group sessions and individual contact made via telephone and email by the interventionist | During months 1 to 6, participants attend three weekly group sessions and one individual counselling session per month during                 | 204 | Unclear, but national campaign challenged participants to meet specific goals. |                                                         |

|            |                                                                                                                   |                             |                                                                                                                                                                            |                                                            |                                                                                                                                                                                            |                                                                                                                                                                                                                     |                                                                                                                                                                                                 |                                                                                                                                                                                        |                                                |
|------------|-------------------------------------------------------------------------------------------------------------------|-----------------------------|----------------------------------------------------------------------------------------------------------------------------------------------------------------------------|------------------------------------------------------------|--------------------------------------------------------------------------------------------------------------------------------------------------------------------------------------------|---------------------------------------------------------------------------------------------------------------------------------------------------------------------------------------------------------------------|-------------------------------------------------------------------------------------------------------------------------------------------------------------------------------------------------|----------------------------------------------------------------------------------------------------------------------------------------------------------------------------------------|------------------------------------------------|
|            |                                                                                                                   | support and education (DSE) |                                                                                                                                                                            |                                                            |                                                                                                                                                                                            |                                                                                                                                                                                                                     | months 7 to 12. During years 2 to 4, participants attended one in-person meeting (20-30 mins) with interventionist each month, second contact was via phone (10-15 mins) or email 2 weeks later |                                                                                                                                                                                        | 59% completion rate (but 4 year intervention ) |
| Unick 2017 | Examine the MVPA differences between participants who maintain and do not maintain their magnitude of weight loss | NA                          | Prescribes calorie goal of 1,200 to 1,800 kcal/d dependant on body weight. Participants we given home based PA regimen designed to gradually increase structured activity. | Participants provided with diabetes support and education. | 1 Face-to-face counselling session with their interventionist , group sessions were offered later in the trial. Individual contact was made via telephone and email by the interventionist | During months 1 to 6, participants attend three weekly group sessions and one individual counselling session per month during months 7 to 12. During years 2 to 4, participants attended one in-person meeting (20- | 204                                                                                                                                                                                             | Homebase PA designed to gradually increase structured activity to greater than 175 min/wk for first 6 months, then further increase to greater than 200 min/wk for those who initially |                                                |

|            |                                                                                                                                                                                                                     |                                                                                                                                                                                                |                                                                                                                                                                                                              |                                                                                                                                                                                                                                                   |                                                                                                                                                                                                                                                                                               |                                       |                                                                                                            |                                                                           |                         |
|------------|---------------------------------------------------------------------------------------------------------------------------------------------------------------------------------------------------------------------|------------------------------------------------------------------------------------------------------------------------------------------------------------------------------------------------|--------------------------------------------------------------------------------------------------------------------------------------------------------------------------------------------------------------|---------------------------------------------------------------------------------------------------------------------------------------------------------------------------------------------------------------------------------------------------|-----------------------------------------------------------------------------------------------------------------------------------------------------------------------------------------------------------------------------------------------------------------------------------------------|---------------------------------------|------------------------------------------------------------------------------------------------------------|---------------------------------------------------------------------------|-------------------------|
|            |                                                                                                                                                                                                                     |                                                                                                                                                                                                |                                                                                                                                                                                                              |                                                                                                                                                                                                                                                   |                                                                                                                                                                                                                                                                                               |                                       | 30 mins) with interventionist each month, second contact was via phone (10-15 mins) or email 2 weeks later |                                                                           | met the goal.<br><br>NR |
| Yates 2017 | To investigate whether an established behavioural intervention, Walking Away from Type 2 diabetes mellitus, is effective at promoting and sustaining increased walking activity when delivered within primary care. | Protection motivation theory in which an association between perceived disease severity and the intention to be physically active in those with Type 2 diabetes mellitus has been demonstrated | Walking Away from Type 2 diabetes mellitus, a pragmatic 3-h group-based structured education programme incorporating pedometer use with annual follow-up refresher sessions were offered to the participants | Control participants received a standardized booklet detailing information on Type 2 diabetes mellitus risk informed by Leventhal's common sense model and how physical activity and lifestyle change can be used to prevent or delay the disease | The participants in the intervention group were provided with pedometer and step/day diary provided free. They were encouraged to increase their physical activity levels up to 3000 step/day over baseline levels depending on individual preference and ability. Participants set an action | 2 follow up session: 12 and 24 months | 52                                                                                                         | Increasing PA by 500 steps/day every fortnight<br><br>71% completion rate |                         |

|  |            |                                                                                                                              |                                                                                                                       |                                                                                                                                                    |                                                                                                        |                                                                                                                                             |                                                    |    |                                   |
|--|------------|------------------------------------------------------------------------------------------------------------------------------|-----------------------------------------------------------------------------------------------------------------------|----------------------------------------------------------------------------------------------------------------------------------------------------|--------------------------------------------------------------------------------------------------------|---------------------------------------------------------------------------------------------------------------------------------------------|----------------------------------------------------|----|-----------------------------------|
|  |            |                                                                                                                              |                                                                                                                       |                                                                                                                                                    |                                                                                                        | plan detailing where, when and how their first proximal goal would be reached and were encouraged to repeat this process for each new goal. |                                                    |    |                                   |
|  | Young 2016 | To test a home-based intervention to enhance patient activation and lead to improved SM adherence for heart failure patients | Bandura's conceptualization of self-efficacy, Hibbard's patient activation theory and chronic disease self-management | Received both usual care and the 12-week PATCH intervention (FTF in hospital SM training session and post discharge sessions deliver by telephone) | Received written and verbal information about HF self-care and scheduled follow-up doctor appointments | Intervention present in variety of formats (verbal, written, visual) with interactive ability.                                              | Each intervention session lasted about 45-50 mins. | 26 | NA<br><br>95% completed the trial |



eFigure 1: Risk of bias assessments study-by-study

| Study            | Random sequence generation (selection bias) | Allocation concealment (selection bias) | Blinding of outcome assessment (detection bias) | Incomplete outcome data (attrition bias) | Selective reporting (reporting bias) |
|------------------|---------------------------------------------|-----------------------------------------|-------------------------------------------------|------------------------------------------|--------------------------------------|
| Anderson 2015    | ?                                           | ?                                       | ?                                               | ?                                        | ?                                    |
| Araiza 2006      | ?                                           | ?                                       | ?                                               | ?                                        | ?                                    |
| Baillot 2018     | ?                                           | ?                                       | ?                                               | ?                                        | ?                                    |
| Bjorgaas 2008    | ?                                           | ?                                       | ?                                               | ?                                        | ?                                    |
| Borland 2014     | ?                                           | ?                                       | ?                                               | ?                                        | ?                                    |
| Cayir 2015       | ?                                           | ?                                       | ?                                               | ?                                        | ?                                    |
| Christle 2017    | ?                                           | ?                                       | ?                                               | ?                                        | ?                                    |
| Cowie 2011       | ?                                           | ?                                       | ?                                               | ?                                        | ?                                    |
| Cupples 2013     | ?                                           | ?                                       | ?                                               | ?                                        | ?                                    |
| Dasgupta 2017    | ?                                           | ?                                       | ?                                               | ?                                        | ?                                    |
| De Greef 2010    | ?                                           | ?                                       | ?                                               | ?                                        | ?                                    |
| De Greef 2011    | ?                                           | ?                                       | ?                                               | ?                                        | ?                                    |
| De Greef 2011*   | ?                                           | ?                                       | ?                                               | ?                                        | ?                                    |
| Devi 2014        | ?                                           | ?                                       | ?                                               | ?                                        | ?                                    |
| Diedrich 2010    | ?                                           | ?                                       | ?                                               | ?                                        | ?                                    |
| Engel 2006       | ?                                           | ?                                       | ?                                               | ?                                        | ?                                    |
| Fayehun 2018     | ?                                           | ?                                       | ?                                               | ?                                        | ?                                    |
| Frederix 2015    | ?                                           | ?                                       | ?                                               | ?                                        | ?                                    |
| Greaney 2017     | ?                                           | ?                                       | ?                                               | ?                                        | ?                                    |
| Guiraud 2012     | ?                                           | ?                                       | ?                                               | ?                                        | ?                                    |
| Holliday 2018    | ?                                           | ?                                       | ?                                               | ?                                        | ?                                    |
| Houle 2011/12    | ?                                           | ?                                       | ?                                               | ?                                        | ?                                    |
| Izawa 2012       | ?                                           | ?                                       | ?                                               | ?                                        | ?                                    |
| Kaltzmarzyk 2011 | ?                                           | ?                                       | ?                                               | ?                                        | ?                                    |
| Kirk 2009        | ?                                           | ?                                       | ?                                               | ?                                        | ?                                    |
| Miyamoto 2017    | ?                                           | ?                                       | ?                                               | ?                                        | ?                                    |
| Paschall 2005    | ?                                           | ?                                       | ?                                               | ?                                        | ?                                    |
| Pekmezci 2017    | ?                                           | ?                                       | ?                                               | ?                                        | ?                                    |
| Reid 2011        | ?                                           | ?                                       | ?                                               | ?                                        | ?                                    |
| Ribeiro 2017     | ?                                           | ?                                       | ?                                               | ?                                        | ?                                    |
| Tudor-Locke 2004 | ?                                           | ?                                       | ?                                               | ?                                        | ?                                    |
| Unick 2016       | ?                                           | ?                                       | ?                                               | ?                                        | ?                                    |
| Unick 2017       | ?                                           | ?                                       | ?                                               | ?                                        | ?                                    |
| Van Dyck 2013    | ?                                           | ?                                       | ?                                               | ?                                        | ?                                    |
| Yates 2017       | ?                                           | ?                                       | ?                                               | ?                                        | ?                                    |
| Young 2016       | ?                                           | ?                                       | ?                                               | ?                                        | ?                                    |

**eFigure 2: Forest plot of Accelerometer vs pedometer use**

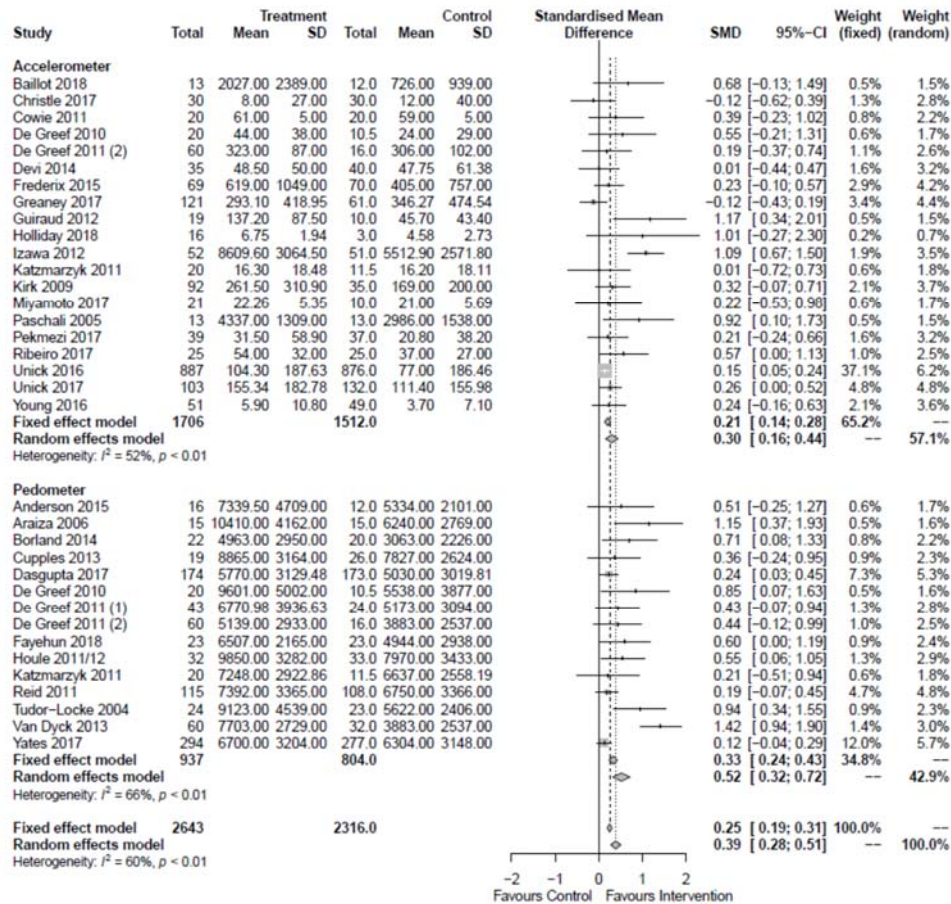

eFigure 3: Forest plot of pedometer use on mean difference scale

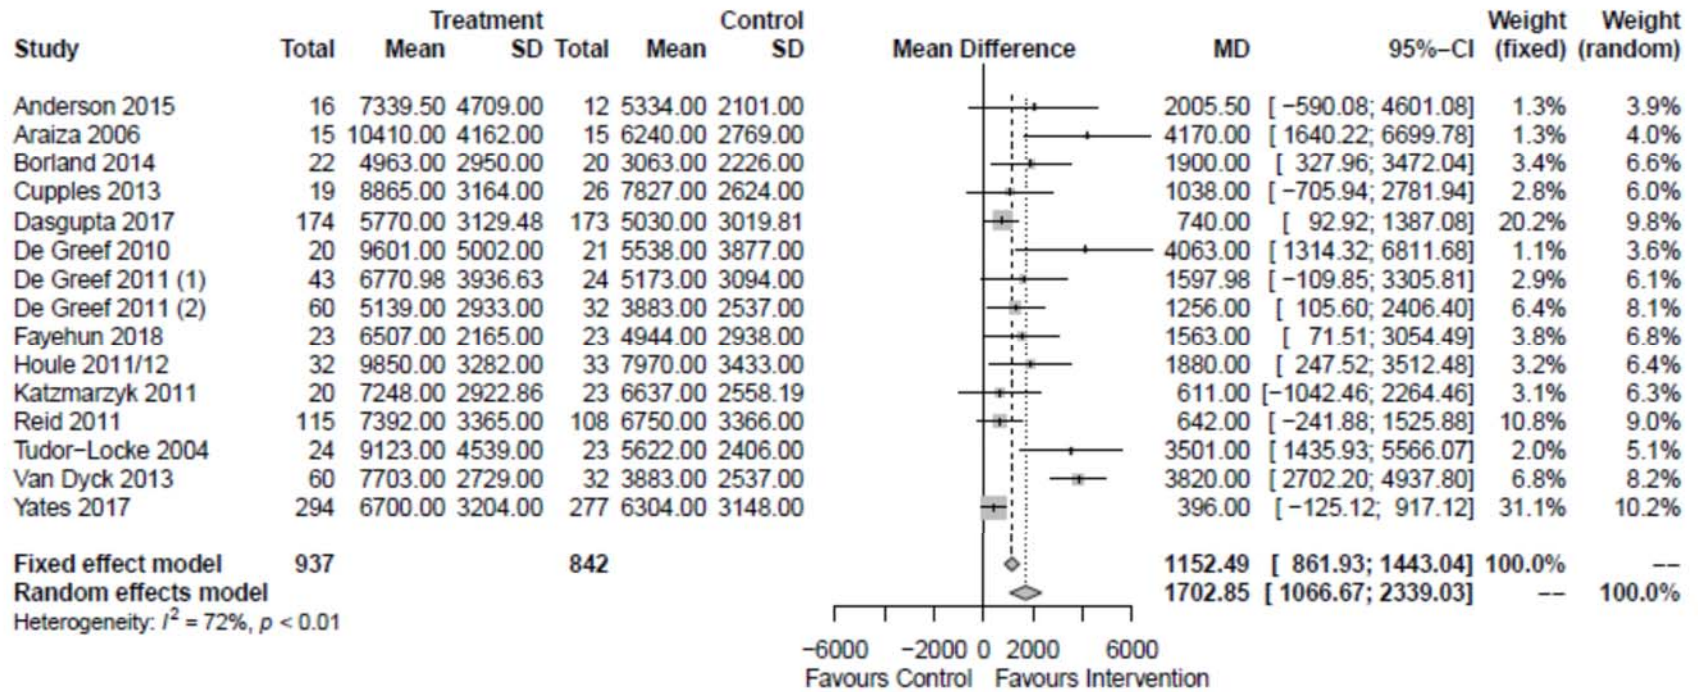

eFigure 4: Cumulative forest plot of PA performance based on total PA engagement time (combined by total minutes)

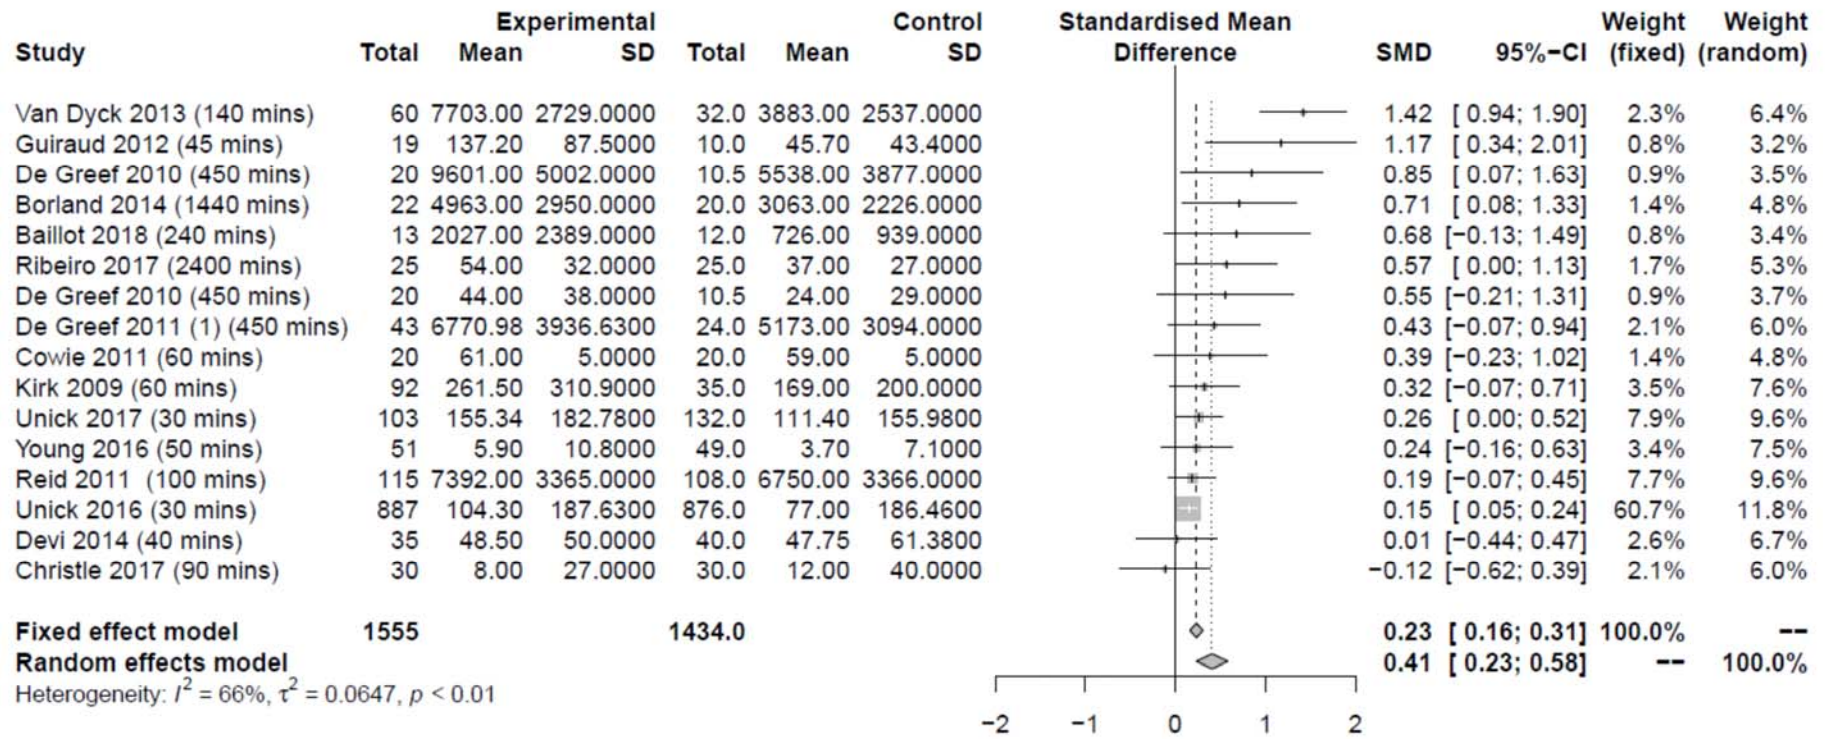

Figure 5: Forest plot of secondary physical activity measures

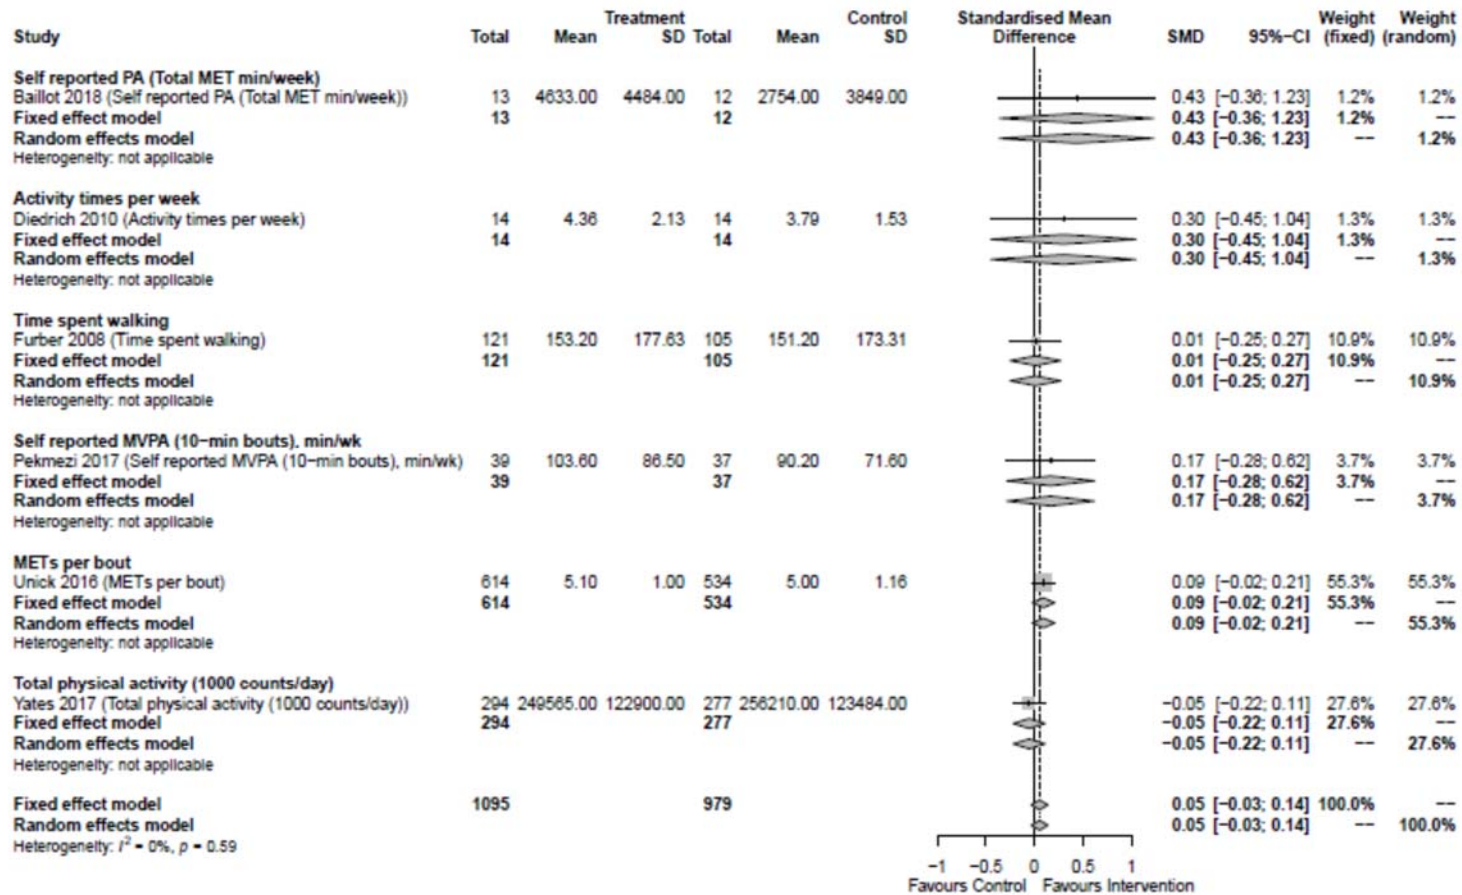

eFigure 6: Individual funnel plots of accelerometer and pedometer

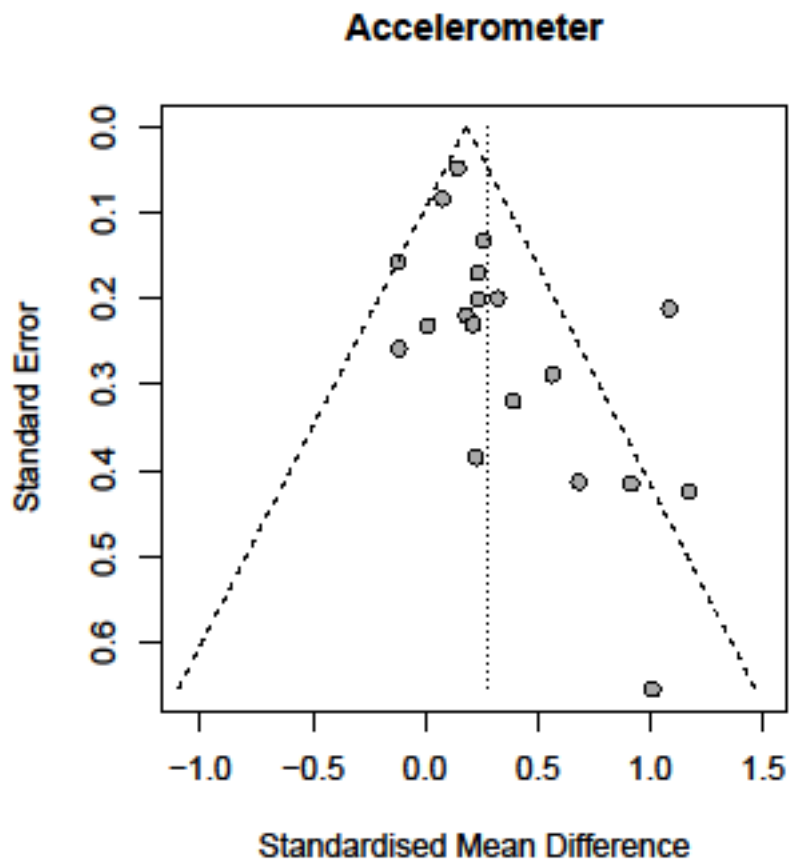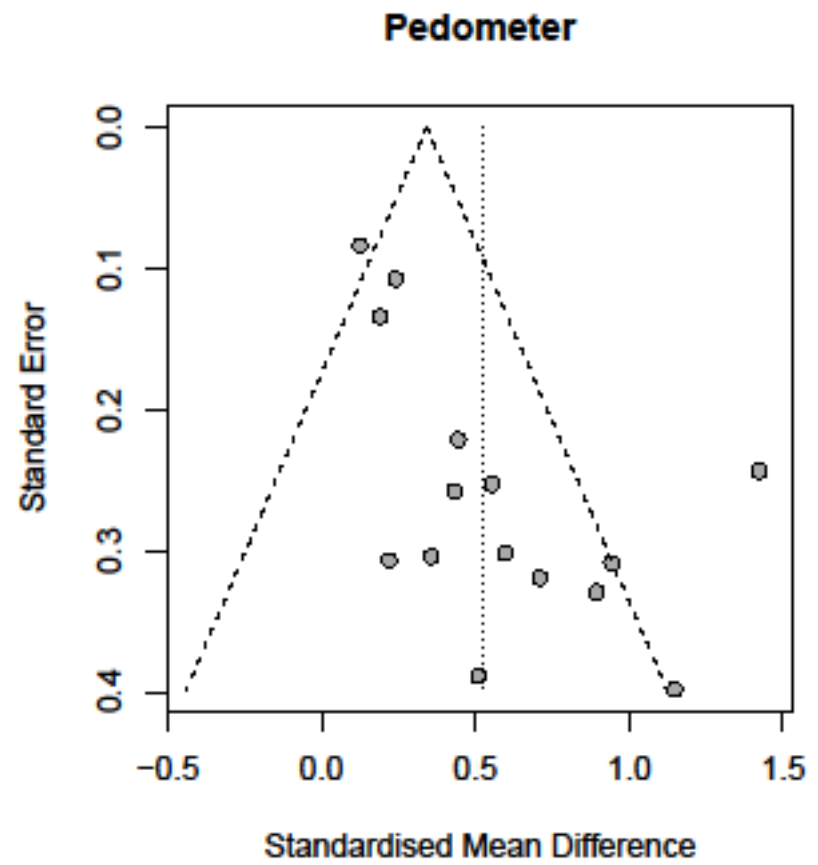

Supplement: jamanetwopen-2-e1912895-s001.pdf [file jamanetwopen-2-e1912895-s001.pdf]
